# Supplementary material for: Genomic epidemiology of COVID-19 in care homes in the east of England
Source: eLife journal article supplement (doi:10.7554/elife.64618), 2021-03-02
Supplement: supp [file elife-64618-supp-v1.zip]

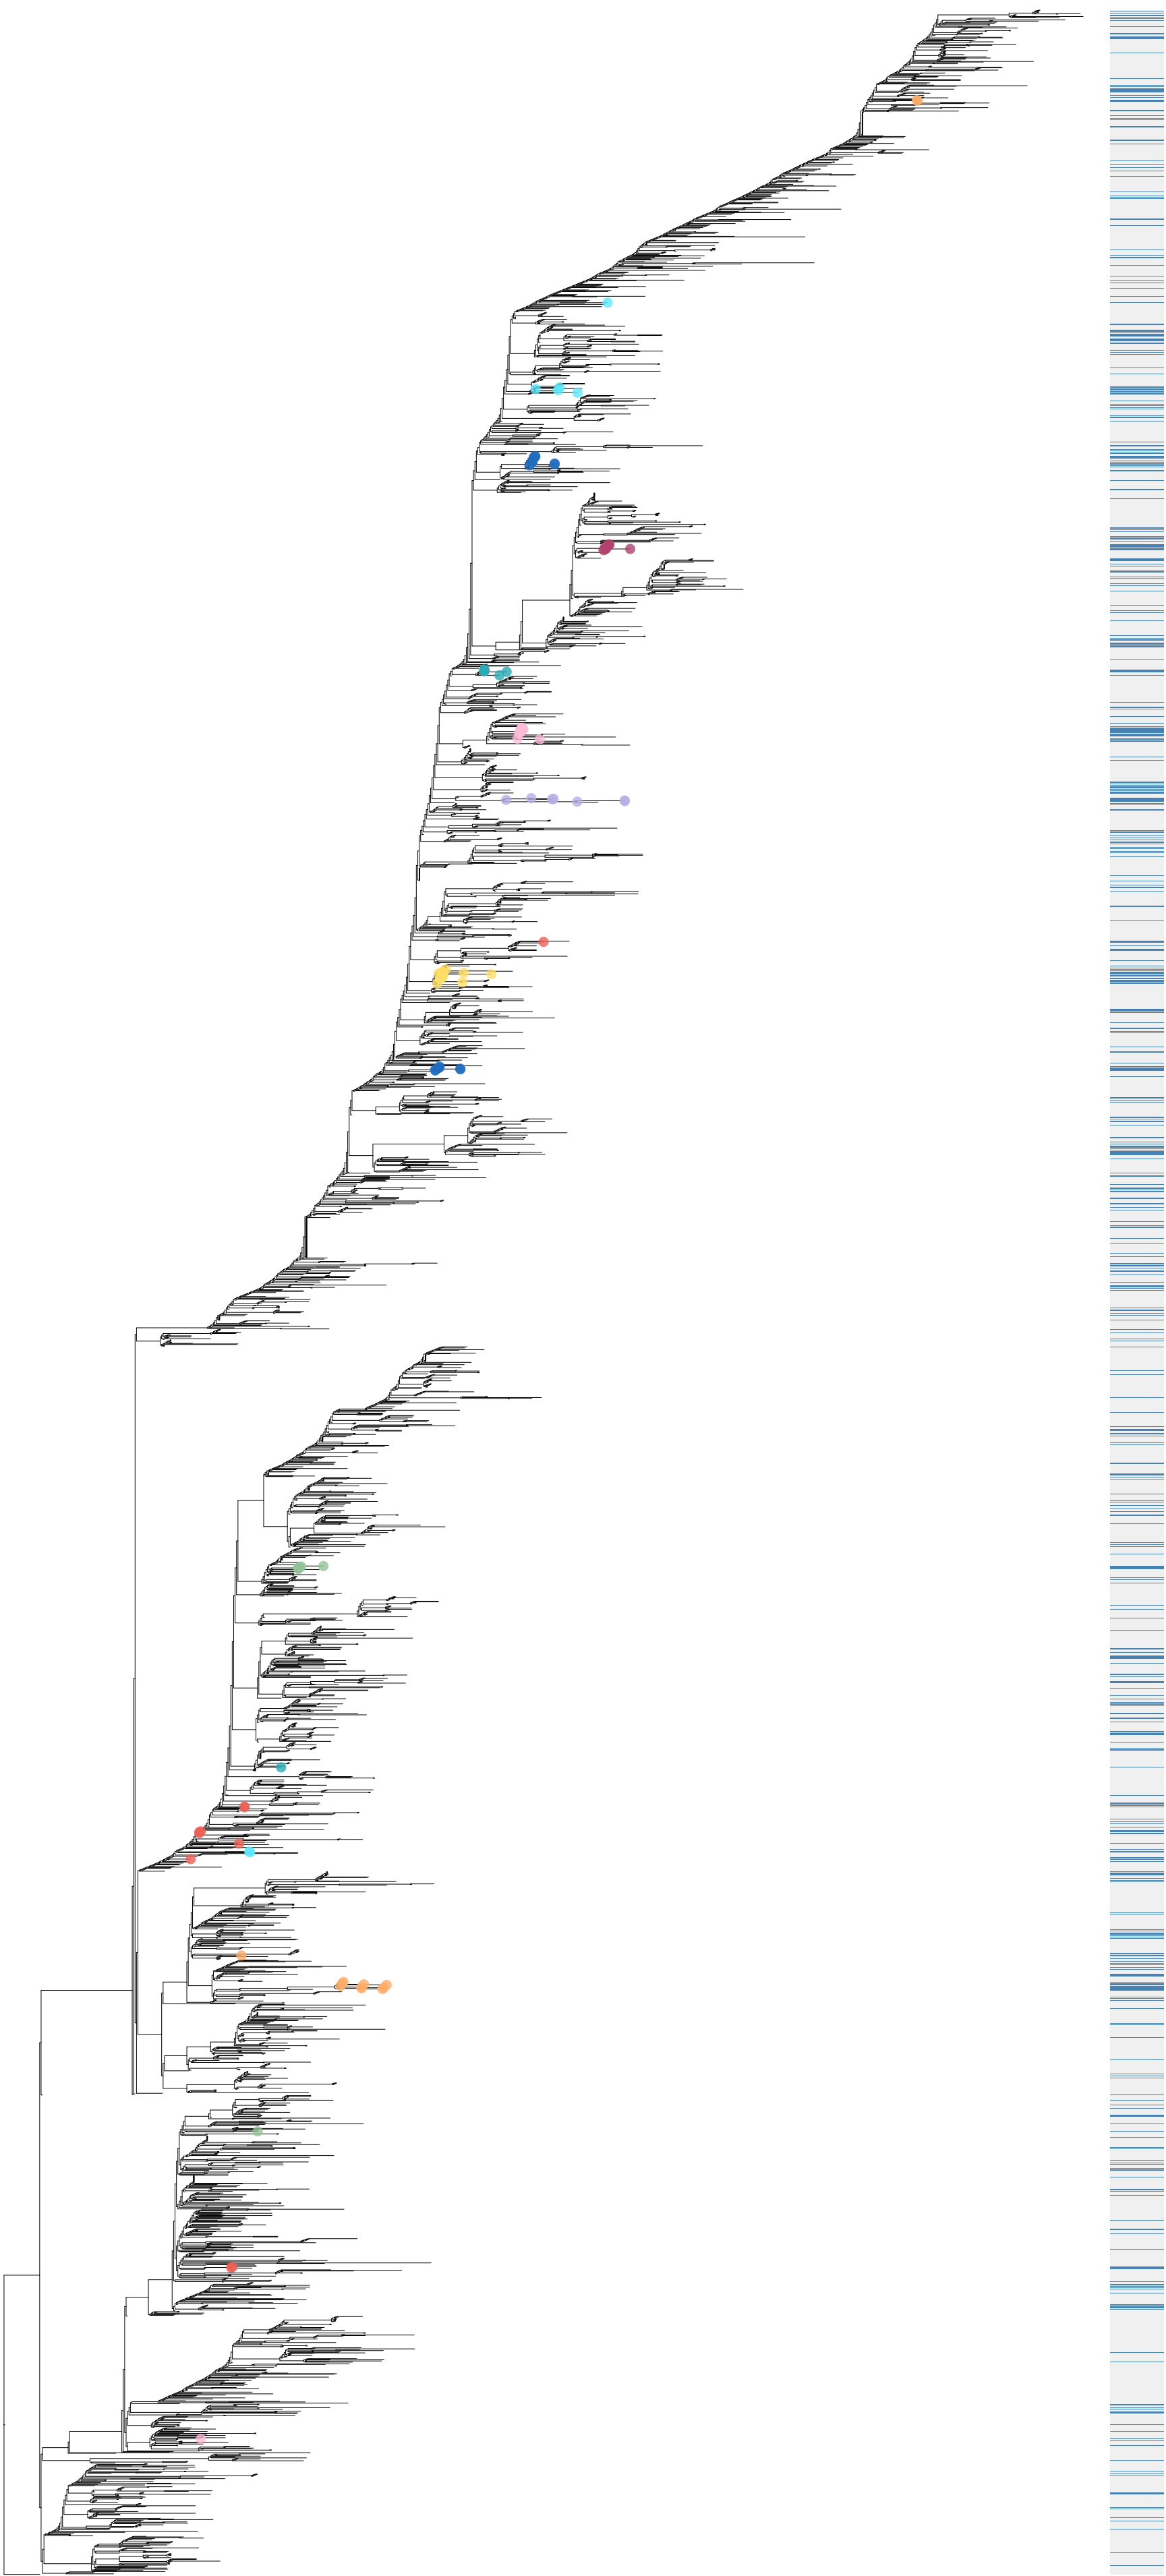

■ Care resident  
■ Other

- CARE0032
- CARE0061
- CARE0063
- CARE0097
- CARE0151
- CARE0173
- CARE0263
- CARE0264
- CARE0277
- CARE0314
