# Supplementary material for: Genomic epidemiology of COVID-19 in care homes in the east of England
Source: eLife journal article supplement (doi:10.7554/elife.64618), 2021-03-02

Date difference from first to last sample (days)

50  
40  
30  
20  
10  
0

care homes

clusters

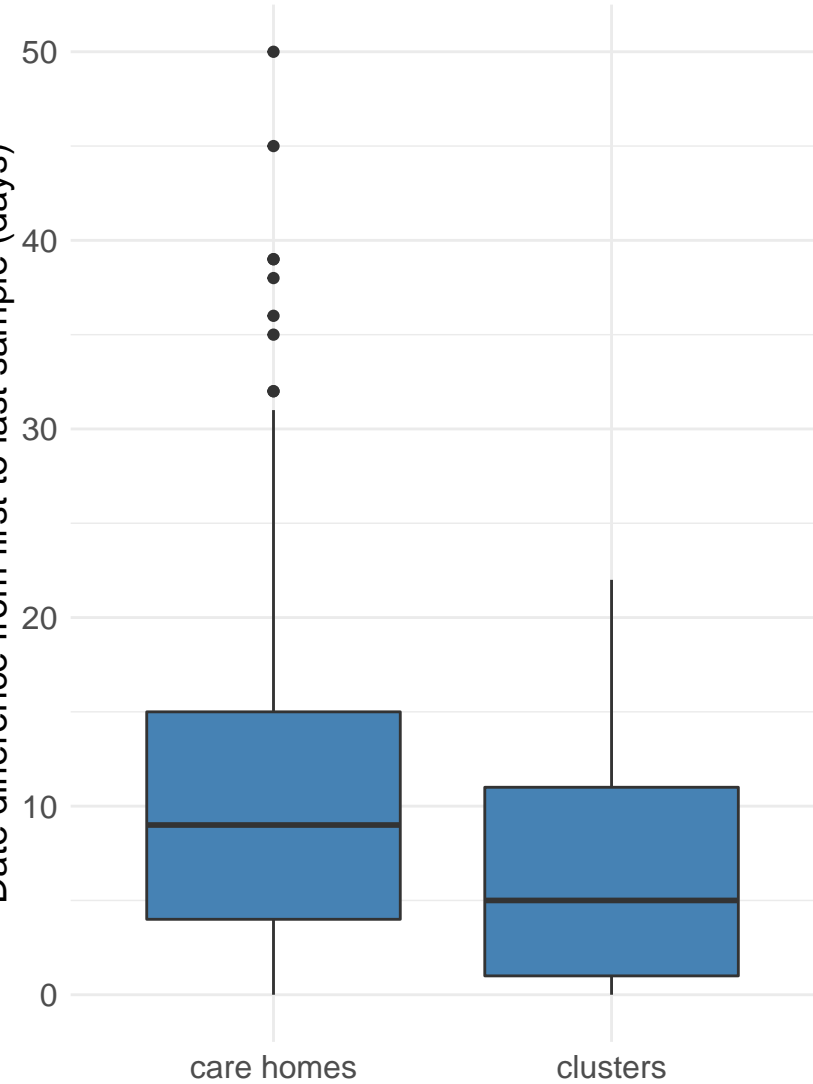

Supplement: supp [file elife-64618-supp-v1.zip]
