# Supplementary material for: Genomic epidemiology of COVID-19 in care homes in the east of England
Source: eLife journal article supplement (doi:10.7554/elife.64618), 2021-03-02
Supplement: supp [file elife-64618-supp-v1.zip]

**A**

Sample counts

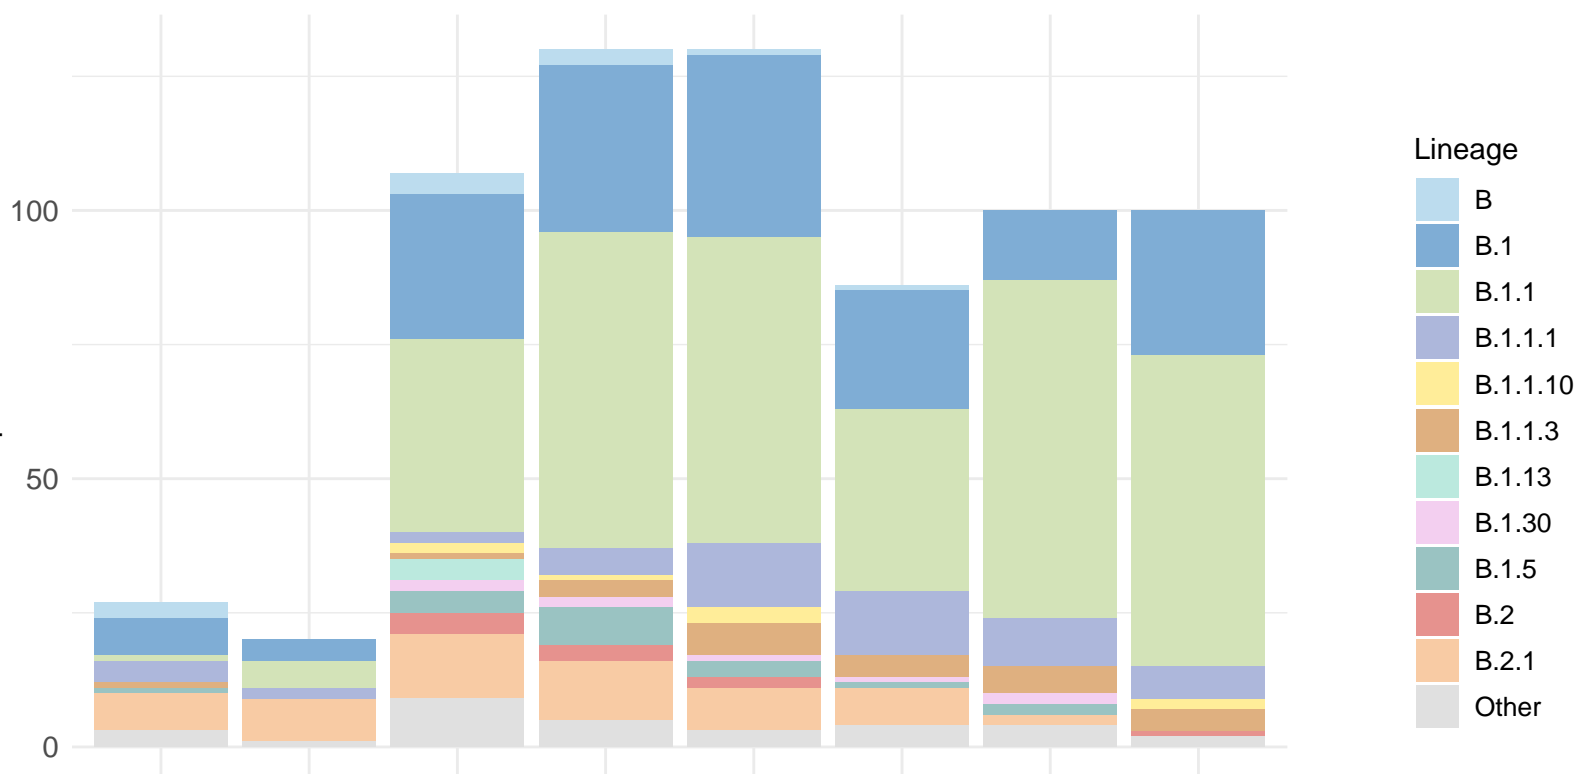**B**

Sample counts

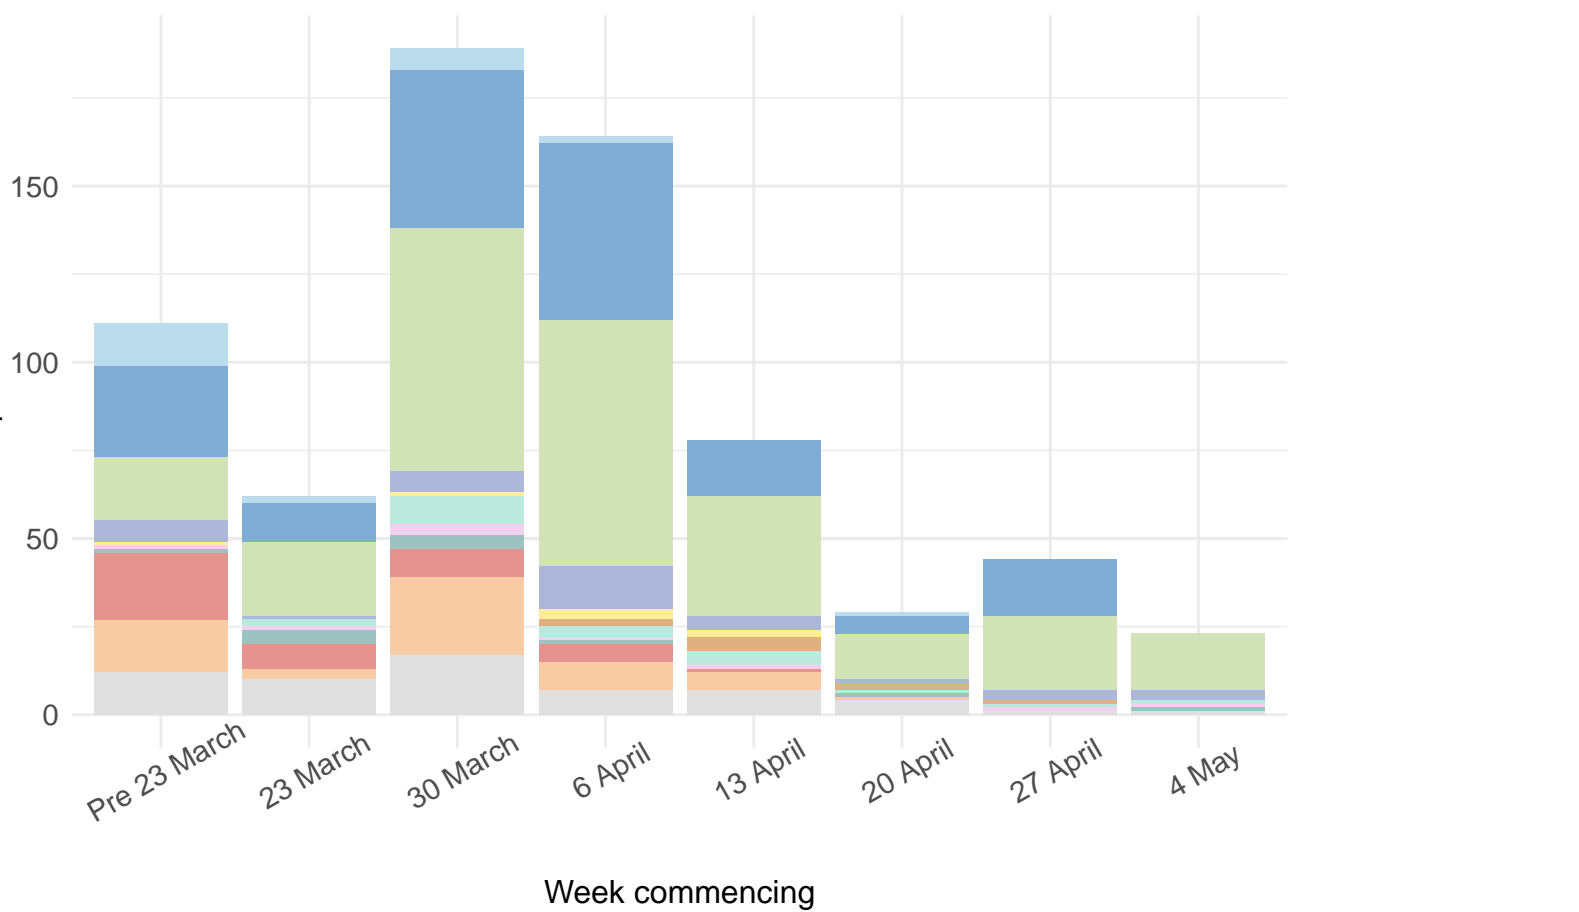

Week commencing
